# Supplementary material for: Genetic Testing Experiences Among Parents of Children with Autism Spectrum Disorder in the United States
Source: Springer Nature journal article supplement (doi:10.1007/s10803-019-04200-z), 2019-09-21
Supplement: MOESM1 [file 17196290]

***Supplementary Material: Study Questionnaire***

1. I have taken my child(ren) with ASD to undergo ASD genetic testing.

☐Yes ***(If ‘Yes’, please continue this survey)***

☐No

- 1. Please select the type of ASD genetic testing that your child(ren) with ASD has/have undergone: ***(Please check all that apply)***

☐ Fragile X

☐ G-banded Karyotype

☐ Chromosomal Microarray Analysis (CMA)

☐ Gene Sequencing and Deletion/Duplication Analysis

☐ I don't know/I am not sure

☐ Other *(Please specify):* ________________________________________________

- 1. Your level of satisfaction with ASD genetic testing:

☐ Very Unsatisfied

☐ Not Satisfied

☐ Satisfied

☐ Very Satisfied

- 1. If you choose “Very Unsatisfied” or “Not Satisfied”, please state your reason(s): ***(Please check all that apply)***

☐ The process of ASD genetic testing took a long time (e.g., long waiting time to receive genetic testing results, too much paperwork to fill out)

☐ The ASD genetic testing providers were unfriendly

☐ The ASD genetic testing providers could not explain the genetic testing results well

☐ The ASD genetic testing results were too hard for me to understand

☐ The ASD genetic testing results made me confused

☐ The ASD genetic testing didn't provide any new treatment options that could improve my child(ren)'s condition

☐ The ASD genetic testing didn't make any change to my family’s day-to-day experience

☐ The ASD genetic testing merely confirmed what I already knew to be true about my child(ren)

☐ The ASD genetic testing results made me feel guilty about my child(ren)

☐ The ASD genetic testing results caused some family conflicts

☐ The ASD genetic testing results were inaccurate

☐ The ASD genetic testing was too expensive

☐ Other *(Please specify):* ________________________________________________

- 1. If you choose “Satisfied” or Very satisfied, please state your reason(s): ***(Please check all that apply)***

☐ The ASD genetic testing results offered an explanation for my child(ren)’s condition, which made me feel comforted

☐ The ASD genetic testing results reduced my feelings of guilt for my child(ren) with ASD

☐ The ASD genetic testing results helped me explain to others (e.g., medical providers, teachers, caretakers, and relatives) that my child(ren)’s behavior was the result of a medical condition

☐ The ASD genetic testing results helped me to access additional services or resources for my child(ren) with ASD

☐ The ASD genetic testing results helped me to examine my child(ren)’s problems, and enabled me to improve my understanding of my child(ren)’s behaviors, capabilities, and potential

☐ The ASD genetic testing results helped me gain a better understanding of my child(ren)’s strengths and weaknesses, and also helped me develop more realistic expectations for my child(ren) with ASD

☐ The ASD genetic testing results informed medical care for our child(ren) with ASD

☐ The ASD genetic testing results helped me in treatment planning for my child(ren) with ASD

☐ The ASD genetic testing results helped me abandon approaches that could be futile or harmful(e.g., avoiding vaccinations and restrictive diets)

☐ The ASD genetic testing results played a potential role in future reproductive decisions for my child(ren) or other family members

☐ The ASD genetic testing results helped me get connected with other families with children with ASD, or with ASD organizations

☐ The ASD genetic testing results can contribute to scientific knowledge and research, which would eventually lead to benefits for my own child(ren) with ASD, along with others

☐ Other *(Please specify):* ________________________________________________

- 1. Would you recommend ASD genetic testing to other parents of children with ASD?

☐ No, I wouldn’t ***(Please state your reason)***

____________________________________________________________________________________________________________________________________________________________

☐ Yes, I would ***(Please state your reason)***

____________________________________________________________________________________________________________________________________________________________

☐ It depends ***(Please state your reason)***

____________________________________________________________________________________________________________________________________________________________

☐ I don't know or I am not sure ***(Please state your reason)***

____________________________________________________________________________________________________________________________________________________________

***Note***

*Some survey options under questions 1.3 and 1.4 were adopted from the following two studies:*

*Giarelli, E., & Reiff, M. (2015). Mothers' appreciation of chromosomal microarray analysis for autism spectrum disorder. Journal for Specialists in Pediatric Nursing, 20(4), 244-258.*

*Reiff, M., Giarelli, E., Bernhardt, B. A., Easley, E., Spinner, N. B., Sankar, P. L., et al. (2015). Parents’ perceptions of the usefulness of chromosomal microarray analysis for children with autism spectrum disorders. Journal of Autism and Developmental Disorders, 45(10), 3262-3275.*
